1 **The effect of nutrient storage on courtship behavior and copulation frequency in the**  
2 **fruit fly, *Drosophila melanogaster*.**

3

4 Hannah Ananda Bougleux Gomes<sup>a1&</sup>, Justin R. DiAngelo<sup>b&</sup>, and Nicholas Santangelo<sup>a\*&</sup>

5

6

7

8 <sup>a</sup> Department of Biology, 114 Hofstra University, Hempstead, NY, 11549

9

10 <sup>b</sup> Division of Science, Penn State Berks, Reading, PA 19610

11

12 <sup>1</sup> Present address: Harvard University, Department of Stem Cell and Regenerative  
13 Biology, 7 Divinity Ave, Cambridge, MA 02138

14

15

16 \*Corresponding author:

17 E-mail: [Nicholas.santangelo@hofstra.edu](mailto:Nicholas.santangelo@hofstra.edu)

18

19

20

21 <sup>&</sup>These authors contributed equally to the work

22

23

24

25

26

27

28

29

30

## 31 **Abstract**

32 Nutrient storage and metabolism effects on reproductive behavior are well studied in  
33 higher vertebrates like mammals, but are less understood in simpler systems. *Drosophila*  
34 *melanogaster* is well suited to study the ramifications of diet and metabolic energy  
35 storage on reproductive behaviors as they are commonly used to explore energy  
36 mobilization pathways. We tested, for the first time, courtship of the naturally occurring  
37 *adipose* (*adp<sup>60</sup>*) mutant which over-accumulates triglycerides and glycogen on a normal  
38 diet. We also fed wild type (WT) flies either a normal diet, high fat diet or food deprived  
39 them before measuring courtship, copulations, and glycogen and triglyceride levels.  
40 *Adipose* mutants decreased both courtship and copulation frequency, yet showed the  
41 highest glycogen and triglyceride levels. We suggest the *adp<sup>60</sup>* physique and/or an altered  
42 ability to utilize mobilize energy explains these effects. Food deprived WT flies had the  
43 lowest glycogen and triglycerides but exhibited shortened courtship latencies with  
44 increased courtship behaviors. This may be due to a decreased lifespan of food deprived  
45 flies leading to a greater reproductive drive. However, high fat fed flies copulated more  
46 frequently and had the highest triglycerides among WT groups, yet equal glycogen levels  
47 to the normal fed WT group. Thus, a high fat diet either increases male attractivity or  
48 male courtship persistence. Taken together, available diet and nutrient storage affects  
49 male fly reproductive behavior in a unique manner, which may be explained by their  
50 natural history, and provides a paradigm for understanding energetics based on  
51 reproductive potential.

52

53

## 54 **Introduction**

55 Caloric intake is known to play an important role in different organisms' behaviors. For  
56 example, consumption of a high-calorie diet alters the function of the mammalian  
57 circadian clock, thereby affecting behavioral processes, such as locomotor activity, sleep  
58 and energy homeostasis [1]. In the fruit fly *Drosophila melanogaster*, the presence of  
59 food promotes aggressive behaviors in males mediated by sweet-sensing gustatory  
60 receptor neurons [2]. Conversely, caloric restriction can also affect behaviors. A long-  
61 term experiment with humans in free-living conditions showed that caloric restriction  
62 resulted in decreased physical activity levels [3]. Studies such as these show that altering  
63 caloric intake not only impacts behavior via activity level decisions, but social  
64 interactions as well.

65 In addition to caloric intake influencing behavior, the storage of energy as  
66 glycogen and fat and the ability to mobilize these stores also influences reproductive  
67 behaviors. For example, available energy resources during mating of tetrapods are well  
68 known to be related to the physiological ability of these animals to carry out reproduction  
69 (mammals: reviewed in [4], [5], [6], [7]; birds: reviewed [8], [9]; reptiles: [10], [11]). The  
70 clear link between reproductive physiology and energy reserves suggests that appetitive  
71 reproductive behaviors should also be tightly linked to these energy reserves. Such a  
72 mechanism would enable organisms to adequately assess whether the proper energetic  
73 resources are available to complete the process of reproduction once started. This is well  
74 known to happen in mammals, where the hormonal pathways that control energy balance  
75 are directly linked to the ones that control sexual reproduction (reviewed in [6]).  
76 However outside of mammals, data on the link between reproductive behavior and

77 caloric intake and mobilization is lacking (but see [12] and review within on birds). In  
78 addition, males are rarely the subject of such studies, yet one would expect that, despite  
79 reproduction requiring less energetic output for males, the same selective pressure of  
80 monitoring metabolic energy resources in making reproductive decisions should remain.  
81 Cheng et al. [13] showed that male oriental fruit flies (*Bactrocera dorsalis*) reared on  
82 food with high levels of D-glucose exhibit higher success in mating. Also, Mediterranean  
83 fruit flies (*Ceratitidis capitata*) caught while undergoing reproductive behaviors had higher  
84 lipid levels than flies at rest [14] with males having much more variable levels of lipids  
85 than females. Yet the effect of energy availability on appetitive reproductive behaviors  
86 such as courtship is not as well known. Such data could provide the beginnings of a  
87 framework to understand how metabolic energy resources shape appetitive behaviors.

88         In order to explore any correlation that may exist between reproductive behavior  
89 and metabolism, energy storage can be manipulated genetically and/or through diet. The  
90 fruit fly *Drosophila melanogaster* has been a useful model system for these types of  
91 studies because of its high genetic conservation to humans, its ease of obtaining large  
92 sample sizes, the ease of genetic and dietary manipulations, and well-characterized and  
93 robust reproductive behaviors that can be easily quantitated. In *D. melanogaster* there  
94 exist mutants in metabolic genes that result in lean or obese phenotypes similar to that  
95 seen when wild type flies are food deprived or fed a high-fat diet, respectively [15].  
96 These mutants can be utilized to test whether altering metabolic pathways affects  
97 behavior. One such gene that can be useful in this regard is *adipose* (*adp*). The most well-  
98 characterized mutation of this gene is *adp<sup>60</sup>*, a 23 nucleotide deletion resulting in  
99 increased storage of triglycerides in the fly fat body, providing an obesity phenotype,

100 similar to the triglyceride accumulation observed when flies are fed a high fat diet [16],  
101 [17]. While both the *adp<sup>60</sup>* mutation and feeding flies a high fat diet leads to an obesity  
102 phenotype, the *adp<sup>60</sup>* mutation results in chronic obesity as the fat accumulation is  
103 observed in both the larval and adult stages of development [16], [18]. This is different  
104 than the obesity observed after feeding flies a high fat diet as this obesity is acute and  
105 only appears in adult flies after 4-5 days of being exposed to the altered diet [17]. While  
106 much is known about the metabolic consequences due to the loss of the *adipose* gene,  
107 little is known about how the obesity phenotype resulting from this *adp<sup>60</sup>* mutation affects  
108 reproductive behaviors.

109       Metabolic mutants can potentially have similar changes in metabolism as those  
110 fed different diets without manipulating the feeding regimen, thus strengthening the link  
111 between energy storage and reproductive behaviors. Both approaches, and reproductive  
112 behavior monitoring, can be easily carried out in *D. melanogaster* making them an ideal  
113 model for which to explore this paradigm. For example, drive to reproduce can be  
114 assessed through courtship behaviors such as wing vibrations, wing scissoring, tapping,  
115 thrusting, and copulation attempts and copulations [19]. In this study, we compare these  
116 reproductive behaviors from *adp<sup>60</sup>* male flies, wild type males fed a high-fat diet, or wild  
117 type males food deprived for 24 hours to wild type male flies fed a normal diet in order to  
118 determine the effects of changes in nutrient storage and metabolism on reproductive  
119 behaviors. For the purposes of this study, female flies are kept constant (i.e. are only of  
120 WT genotype and not diet manipulated) in order to isolate any potential effects of  
121 nutrient storage on male courtship decisions.

122           Therefore, in addressing the effects of obese mutants and high fat feeding and  
123 starvation on reproduction, our study is an opportunity to increase the base of knowledge  
124 on the behavioral effects of obesity by utilizing the *adp<sup>60</sup>* mutant in addition to the diet-  
125 induced obesity model. By comparing the courtship behaviors and frequency of  
126 copulation of male flies fed a high-fat diet, males food deprived for 24 hours, and male  
127 *adp<sup>60</sup>* mutants, with wild type *D. melanogaster* males fed a normal diet, we aim to  
128 understand how energy resources and nutrient availability affect reproductive behaviors.  
129 The use of both diet and *adp<sup>60</sup>* mutants will help establish whether any resulting changes  
130 in male courtship due to diet regime is related to changes in nutrient storage (i.e. presence  
131 or absence of *adp<sup>60</sup>* gene), or is the simply the cue of caloric intake (i.e. high or low  
132 caloric diet).

133           Relative to normal fed wild type flies, we predict *adp<sup>60</sup>* mutant flies, and flies fed  
134 a high-fat diet, to show an increase in copulation frequency and an increase in courtship  
135 behaviors because of the enhanced energy reserves that could be invested in courtship.  
136 This prediction is consistent with data from Kauffmann and Rissman [20] where the  
137 hormone GnRH-II mediates sexual behavior in mice when there are enough energy  
138 resources present. This helps ensure enough energy is available to mediate successful  
139 reproduction. Though invertebrates such as insects may utilize a different hormonal  
140 mechanism, we predict the relationship between energetic requirements and successful  
141 reproduction to be a relatively conserved relationship. Conversely, we expect food  
142 deprived flies to show a decrease in copulation and courtship for similar reasons. We  
143 expect that the *adp<sup>60</sup>* mutants show a similar duration of courtship behaviors and  
144 courtship latency to the wild type flies fed a high-fat diet and thus that *adp<sup>60</sup>* mutants are

145 in fact a good model for understanding the effects of obesity on outward male sexual  
146 behavior.

147

## 148 **Materials and Methods**

### 149 **Fly husbandry**

150 Flies used in this study were: OreR (BL#2376) and *adp*<sup>60</sup> outcrossed into the OreR  
151 genetic background (a gift from Ronald Kuhnlein). For the courtship assays, 1-2 day old  
152 male flies were separated from females and aged 4-5 days before being put into the  
153 courtship apparatus with 3-5-day old wild type OreR virgin females. For high fat diet  
154 studies, OreR males were fed cornmeal-sucrose medium (9g *Drosophila* agar, 40g  
155 sucrose, 65g cornmeal, 25g Red Star whole yeast, 100 mL Karo lite corn syrup in 1200  
156 mL dH<sub>2</sub>O) supplemented with 30% coconut oil as described previously [17] during the 4-  
157 5-day aging period described above. For starvation experiments, male flies were food  
158 deprived on 1% agar for the last 24 hours of the aging period described above.

159

### 160 **Courtship analysis**

161 Males and females were transferred to different sides of the divider in Aktogen ®  
162 courtship chambers by cooling them on ice and transferring with forceps. Once flies  
163 recovered from cooling and were walking normally in the chamber, the divider was  
164 removed allowing flies to interact. A video camera was placed over the chamber and all  
165 pairs were video recorded for three hours. Four chambers were always run together; two

166 normal fed wild type male trials were always paired with two trials of one of the other  
167 three groups (food deprived, high fat diet, and *adp<sup>60</sup>*).

168 Videos were uploaded to a behavioral event recorder program, Observer ®. The  
169 person scoring the behaviors did so blind to which group was being scored. The male  
170 behaviors analyzed were courtship latency, orientation, wing vibration, wing scissor,  
171 tapping, thrust, copulation attempt and copulation [19]. Orientation was defined as when  
172 the male oriented at any direction close to the female's body and typically done for the  
173 entirety for courtship. The start of orientation signaled the start of courtship, and  
174 therefore the start of when the divider was removed allowing a male to see a female to  
175 when orientation began was considered the latency to courtship. Wing vibration was  
176 when the male's wings vibrated horizontally and vertically at different angles. This  
177 behavior is known to create the "courtship song" which is important in the courtship  
178 process of *Drosophila* [21]. Wing scissor was when a fly's wings were extended, crossed  
179 and re-crossed. Tapping was when the male touched any female body part, usually  
180 sideways, with its tarsus. Thrusting, which occurs during copulation and copulation  
181 attempts, was when the male grasped the female's abdomen with his foretarsi, curled his  
182 abdomen downward and forward, making a fast contact with the female's genitalia.  
183 Copulation occurred when a male stabilized on top of the female for a considerable  
184 amount of time, typically 10 -15 minutes. A copulation attempt was counted when the  
185 male grasped the female's abdomen and maintained his abdomen in contact with the  
186 female's genitalia for more than one second (i.e. longer than a thrust), but did not  
187 complete the copulation (i.e. did not stabilize for an extended copulation period of time).  
188



## 189 **Triglyceride, Glycogen and Protein Measurements**

190 Triglyceride, glycogen and protein levels were measured as previously described [22].  
191 Briefly, 2 male flies were homogenized in lysis buffer (140 mM NaCl, 50 mM Tris-HCl,  
192 pH 7.4, 0.1% Triton-X 100, and 1X protease inhibitor cocktail (Roche Life Sciences) by  
193 sonication. Thus, one “sample” consisted of the macromolecule levels measured in two  
194 flies with WT N = 16, *adp<sup>60</sup>* mutant N = 17, high fat diet N = 21, food deprived N = 17.

195 Triglycerides and protein were measured using the Triglycerides Liquicolor Test  
196 (Stanbio) and the BCA Protein Assay Kit (ThermoScientific), respectively, according to  
197 manufacturer’s instructions. Total glucose levels were measured using the Glucose  
198 Oxidase Reagent (Pointe Scientific) after treating samples with 8 mg/mL  
199 amyloglucosidase (Sigma) in 0.2M citrate buffer, pH 5.0 for 2 hours. Free glucose was  
200 measured in samples not treated with amyloglucosidase and glycogen levels were  
201 determined by subtracting free glucose from total glucose. Triglycerides and glycogen  
202 were normalized by dividing each by the total protein concentration of each sample.

203

## 204 **Statistical Analysis**

205 All behaviors (except orientation latency) were corrected for the length of an individual’s  
206 courtship period (i.e. orientation period) and then compared statistically. The number of  
207 wing scissors, number of wing vibrations, and duration of copulation conformed to  
208 parametric assumptions and were analyzed via ANOVA. Total courtship time, courtship  
209 latency, wing scissor duration rate, wing vibration duration rate, and total number of  
210 thrusts were ln transformed to fit parametric assumptions and analyzed via ANOVA. An  
211 overall significant ANOVA test was followed by Tukey tests to identify which groups in

212 the overall test were significantly different. Number of tapping behaviors, rate of tapping  
213 behavior, and rate of thrusting could not be transformed to fit parametric assumptions and  
214 so were analyzed via Kruskal Wallis. No Kruskal Wallis test was significant thus no  
215 multiple comparison testing was necessary for non-parametric analyses. Copulation  
216 frequency between groups was tested via a Pearson Chi-Square test followed up with a  
217 post hoc test using the residuals if the overall was found to be significant using a  
218 Bonferroni adjustment for multiple comparisons and thus an alpha level of 0.01. Energy  
219 data (glycogen, triglyceride and protein content) were analyzed via ANOVA as these data  
220 met all parametric assumptions. Significant overall effects were followed by Tukey  
221 multiple comparisons.

222

## 223 **Results**

### 224 **Copulatory and Courtship Behavior**

225 There was a difference in copulation frequency across groups ( $X^2_{3, N=252} =$   
226 42.395,  $P < 0.001$ ; Fig 1). Post hoc tests revealed that the *adp<sup>60</sup>* mutants had a  
227 significantly lower frequency of copulations (13 / 75, 17.3%) relative to the other three  
228 groups ( $P = 0.001$ ), while the high fat fed flies had a significantly greater proportion of  
229 copulations (24/33, 72.7%) than the other three groups ( $P < 0.001$ ). Food deprived and  
230 wild type flies showed a similar proportion of copulations (food deprived: 20/30, 66.7%,  
231  $P = 0.02$ ; wild type: 62/114, 54.4%,  $P = 0.03$ ).

232

233 **Fig 1. Percentage of successful copulations.** This figure shows the percentage of  
234 successful copulations of food deprived, high fat fed, *adp<sup>60</sup>*, and normal fed flies.

235 Numbers in parentheses represent number of trials run in each group. Different letters  
236 indicate frequencies that were significantly different at  $P < .01$  (based on Bonferroni  
237 adjustment; see text for details).

238

239 Total courtship time among all four groups did not significantly differ ( $F_{3,115} =$   
240  $0.789$ ,  $P = 0.50$ ). However, latency to court did significantly differ ( $F_{3,115} = 13.307$ ,  $P <$   
241  $0.001$ ; Fig 2) with food deprived flies showing a significantly shorter latency time than  
242 either high fat fed flies ( $P = 0.036$ ) or wild type flies ( $P < 0.001$ ), but not relative to *adp*<sup>60</sup>  
243 mutants ( $P = 0.378$ ). There were no significant differences in latency to court among high  
244 fat fed, wild type, and *adp*<sup>60</sup> mutant groups ( $P > 0.1$  in all instances).

245

246 **Fig 2. Courtship latencies.** This figure shows the number of seconds required for flies in  
247 each group to engage in orientation behavior of food deprived, high fat fed, *adp*<sup>60</sup>, and  
248 normal fed flies. Boxes indicate interquartile ranges (IQR); whiskers indicate 1.5x IQR;  
249 “X” indicates points outside 1.5 x IQR; dark circles indicate mean. Different letters  
250 indicate groups that were significantly different at  $P < 0.05$ .

251

252 The total number of courtship behaviors did not significantly differ among all  
253 groups for any behavior (wing scissors:  $F_{3,115} = 0.522$ ,  $P = 0.66$ ; wing vibrations:  $F_{3,115} =$   
254  $0.945$ ,  $P = 0.42$ ; thrusts:  $F_{3,115} = 0.212$ ,  $P = 0.88$ ; tapping:  $\chi^2(3) = 0.25$ ,  $P = 0.96$ ), yet the  
255 rate these behaviors were conducted during courtship did significantly differ for some  
256 behaviors. Rate of wing scissoring significantly differed across groups ( $F_{3,115} = 10.711$ ,  $P$   
257  $< 0.001$ ; Fig 3) with the *adp*<sup>60</sup> mutant exhibiting a significantly lower rate than all other

258 groups (vs. wild type:  $P = 0.002$ ; vs. high fat flies:  $P < 0.001$ ; and vs. food deprived flies:  
259  $P < 0.001$ ). Food deprived flies also showed a significantly higher rate of wing scissoring  
260 relative to wild type flies ( $P = 0.013$ ), but was not different relative to high fat fed flies ( $P$   
261  $= 0.551$ ). The rate of wing scissoring for wild types did not significantly differ from high  
262 fat fed flies ( $P = 0.357$ ). Wing vibrations showed the same differences across groups as  
263 did wing scissoring. Specifically, the rate of wing vibrations significantly differed across  
264 groups ( $F_{3,115} = 12.343$ ,  $P < 0.001$ ) with the *adp<sup>60</sup>* mutant exhibiting a significantly lower  
265 rate than all other groups ( $P < 0.001$  for all comparisons). Food deprived flies showed a  
266 significantly higher rate of wing vibration relative to wild type flies ( $P = 0.006$ ), but was  
267 not different relative to high fat fed flies ( $P = 0.587$ ). Wild type and high fat fed flies  
268 were again not different ( $P = 0.199$ ). There was no significant effect on the rate of  
269 tapping ( $\chi^2(3) = 0.45$ ,  $P = 0.92$ ) or rate of thrusting ( $\chi^2(3) = 4.503$ ,  $P = 0.21$ ) across all  
270 groups.

271

272 **Fig 3. Courtship behavior rate.** The rate at which courtship behavior (wing scissor and  
273 wing vibration) occurred for each group (vertical hatching = food deprived WT flies;  
274 light gray = high fat fed WT flies; dark gray = *adp<sup>60</sup>* mutant flies; stipple = normal WT  
275 fed). Rates are duration of behavior divided by duration of courtship (start of orientation  
276 to start of copulation). Boxes indicate IQR; whiskers indicate data range; dark circles  
277 indicate means. Different capital letters indicate groups that are significantly different for  
278 wing scissor behavior at  $P < 0.05$ . Different lower case letters indicate groups that are  
279 significantly different for wing vibration behavior at  $P < 0.05$ .

280

## 281 **Triglyceride and Glycogen levels**

282 To confirm the efficacy of the high fat diet and the 24-hour food deprivation as well as  
283 the *adp<sup>60</sup>* mutation, triglyceride and glycogen levels were measured in these groups and  
284 compared to wild type flies fed normal food. Consistent with previous reports, there was  
285 a significant overall effect of treatment on the triglyceride per protein ratio ( $F_{3,67} =$   
286  $173.293$ ,  $P < 0.001$ ; Fig 4A) with wild type flies showing a lower ratio than *adp<sup>60</sup>*  
287 mutants ( $P < 0.001$ ) and high fat fed flies ( $P = 0.023$ ), but a higher ratio compared to food  
288 deprived flies ( $P < 0.001$ ) [16], [17], [23], [24]. Food deprived flies also showed a lower  
289 ratio compared to *adp<sup>60</sup>* mutants ( $P < 0.001$ ) and high fat fed flies ( $P < 0.001$ ). High fat  
290 fed flies showed a lower ratio compared to *adp<sup>60</sup>* mutants ( $P < 0.001$ ). There was also a  
291 significant effect of fly/diet type on the glycogen per protein ratio ( $F_{3,67} = 38.524$ ,  $P =$   
292  $0.01$ ; Fig 4B) with wild type flies showing a lower glycogen to protein ratio than *adp<sup>60</sup>*  
293 mutants ( $P < 0.001$ ), a higher level than food deprived flies ( $P = 0.002$ ) similar to that  
294 shown in [24] and no difference than the high fat diet fed group ( $P = 0.874$ ). Food  
295 deprived flies also showed a lower glycogen to protein ratio compared to *adp<sup>60</sup>* mutants  
296 ( $P < 0.001$ ) and high fat fed flies ( $P < 0.001$ ). High fat fed flies showed a lower ratio  
297 compared to *adp<sup>60</sup>* flies ( $P < 0.001$ ).

298

299 **Fig 4. Fat and sugar per protein of flies** A) Triglyceride content per total body protein  
300 for food deprived, high fat fed, *adp<sup>60</sup>*, and normal fed flies. Different capital letters  
301 indicate significant differences at  $P < 0.05$ . B) Glycogen content per total body protein  
302 for food deprived, high fat fed, *adp<sup>60</sup>*, and normal fed flies. See Figure 2 for box and  
303 whisker details. Different lower case letters indicate significant differences at  $P < 0.05$ .

304

## 305 **Discussion**

306 Availability of energy, both in terms of availability of nutrients and lipid and glycogen  
307 storage affected reproductive behaviors in *D. melanogaster* similarly. Contrary to our  
308 prediction, food deprived wild type flies had a decreased latency to court when compared  
309 to all other fly groups indicating that limiting caloric intake actually increases appetitive  
310 reproductive behavior. In addition, once courtship started, food deprived flies showed the  
311 greatest rate of courtship in terms of wing scissoring and wing vibrations which further  
312 supports this notion. However, this increased drive to reproduce did not result in more  
313 copulations. In fact, the high fat fed group enjoyed a significantly greater copulation  
314 frequency than all other groups, with the food deprived and normal fed flies showing  
315 similar copulation frequencies and *adp<sup>60</sup>* showing the least. Thus, while food deprived  
316 flies showed a greater drive and effort to reproduce, the higher copulation rate by high fat  
317 fed flies could indicate that flies fed diets high in fat are more attractive. This suggests  
318 that while energy availability influences male reproductive drive, other aspects of male  
319 appearance or courtship quality (two aspects known to influence female choice [25])  
320 interact to impact reproductive success.

321         We suspect that the higher drive to reproduce shown by food deprived flies is due  
322 to the limited availability of metabolic resources, which could indicate a shortened time  
323 to live and thus a greater immediate investment in reproduction. Previous work has  
324 shown that food deprived flies and flies reared on highly nutrient restricted diets show  
325 decreased longevity compared to those raised on normal diets [26]. Flies who live shorter  
326 periods of time are also known to show increased drive to reproduce. For example, in *D.*

327 *nigrospiracula*, male flies infected with parasites lived shorter lives but dedicated  
328 significantly more time to courting females than uninfected males [27]. Curiously, the  
329 courtship latency among normal fed wild type flies, high fat fed wild type flies and *adp*<sup>60</sup>  
330 mutants were all similar despite *adp*<sup>60</sup> mutants storing excess nutrients compared to wild  
331 type flies. However, courtship latency is indicative of courtship drive, and it is known  
332 that the lifespan of *adp*<sup>60</sup> homozygous males is similar to that of wild type males [28]. In  
333 addition, *adp*<sup>60</sup> mutants are starvation resistant [23]. Thus, *adp*<sup>60</sup> mutants do not appear to  
334 have as compromised reproductive potential based on survival as that of food deprived  
335 wild type flies.

336        Though longevity can be related to reproductive drive in species such as  
337 *Drosophila*, it remains unclear what is the direct cue to this increased drive – the actual  
338 intake of energy-rich molecules and/or the physiological availability of these metabolic  
339 reserves. Food deprived flies, who showed the shortest latency to court along with the  
340 highest rates of courtship behaviors (i.e. wing scissoring and wing vibrations), had the  
341 lowest food availability, and the lowest storage of both glycogen and triglycerides per  
342 body protein content. However, the *adp*<sup>60</sup> mutants, who had a constant availability of  
343 food but do not metabolize their triglycerides and glycogen in the same way as wild type  
344 flies (thus leading to an increased amount of each in our analysis) showed significantly  
345 less wing scissoring and wing vibrations. When considering these mutants show a similar  
346 reproductive drive to normal and high fat fed flies, potentially the availability of nutrients  
347 is involved with reproductive drive and courtship latency, while the appropriate storage  
348 and usage of these sources of energy once ingested is involved in carrying out courtship  
349 song caused by the wing vibration behavior. Perhaps combining diet alteration and the

350 *adp<sup>60</sup>* mutation may allow the determination of whether the availability of nutrients or  
351 normal storage and usage of these nutrients is important for regulating courtship  
352 behaviors. However *adp<sup>60</sup>* mutants are known to have a “lethargic” phenotype where  
353 their overall mobility is less than that of wild type flies [23]. This phenotype may be due  
354 to this altered ability to metabolize nutrients and/or the gross obesity of these animals and  
355 could be related to the decreased wing scissoring and wing vibrations, but it did not affect  
356 the latency to court.

357         An important point to note is that this process could work differently in species  
358 with a different natural history. For example, it is well known that when physiological  
359 fuels are low in mammals, the reproduction cycle stops until such time as there is enough  
360 energy to put into reproduction [7]. This again is likely a function of longevity where  
361 such species can afford to wait for the proper resources. In mammals, it is well  
362 established that there are related, but independent mechanisms that link reproduction to  
363 food intake and physiological energy availability [6]. For example, kissipeptin, which is  
364 known to regulate GnRH and the reproductive axis, is influenced by ghrelin and PYY  
365 secretion (gastrointestinal hormones released upon ingestion) as well as by nutritional  
366 status [29]. Less is known about such pathways in *D. melanogaster*; however, there is  
367 some evidence to support that reproductive behavior is related to food availability (i.e.  
368 intake) and energy storage. For example, altering the amounts of protein and  
369 carbohydrates in the female diet will affect the rate of egg production in wild type *D.*  
370 *melanogaster* [30]. Schultzhaus [31] analyzed the effect of high fat diets on courtship in  
371 *D. melanogaster* and found that while feeding female flies a high fat diet had more  
372 negative effects on reproductive behavior than the same diet did on males, male judgment



373 of female attractiveness was influenced by the high fat feeding. Considering only the wild  
374 type groups in the current study (food deprived, high fat fed, and normal fed), the nutrient  
375 storage data suggest that the reserves of glycogen, and not triglycerides, may serve as a  
376 cue for the change in sexual behavior we see in our study. Food deprived flies had lower  
377 glycogen and triglycerides than all other groups while normal fed and high fat fed flies  
378 courted similarly and had similar glycogen levels but different triglycerides. It follows  
379 that animals assess short term energy stores, such as glycogen, to establish levels of  
380 activity and not long term energy stores like triglycerides. We suspect that these limited  
381 metabolic resources culminated in a greater immediate investment in reproduction.

382 It is unclear why the *adp<sup>60</sup>* mutant contained the highest levels of glycogen and  
383 triglycerides yet courted the least, but many possibilities exist, each of which could  
384 contribute to and help explain the overall reduced mobility phenotype of the *adp<sup>60</sup>* mutant  
385 addressed above. One possibility is the physical structure of increased fat deposits  
386 decreases wing dexterity therefore affecting courtship song. Another is that the *adp<sup>60</sup>*  
387 mutation has additional unrealized effects on muscle activity. The *adp<sup>60</sup>* mutation results  
388 in chronic obesity with excess fat accumulation in both the larval and adult stages of  
389 development [16], [18], [23]; Figure 4A). Potentially these mutants do not mobilize these  
390 fuels in the same way as wild type flies as lipid metabolism in these mutants is suspected  
391 to be different throughout development (see [32] for further discussion). Any negative  
392 effect these metabolic pathways have on muscle function, in turn, could limit their ability  
393 to function properly and affect courtship. Lastly, when these male courtship songs are  
394 altered in this way, males might simply be choosing to decrease their song either because  
395 of a female's lack of interest, or they are responding to their own song. While we cannot

396 address which of these mechanisms is at play, they would all lead to reduced song and/or  
397 low quality song that could lead to an increased rejection by the female fly. In fact, the  
398 lack of courtship song from the *adp<sup>60</sup>* mutants could help explain the low copulation rates  
399 of this group via females “allowing” a copulatory grasp as various *Drosophila* species are  
400 known to reject males on the basis of song [33], [34].

401 While the lack of courtship song via wing vibrations could explain the  
402 significantly lower percentage of successful copulations for *adp<sup>60</sup>* mutants, food deprived  
403 flies did show the most wing vibrations, yet it was high fat fed flies who had the most  
404 copulations. Possibly females enable copulations based on multiple signals with courtship  
405 song being only one. Size of the male could be another (see [25] for further discussion),  
406 as well as number or quality of the cuticular hydrocarbons, which are known chemical  
407 communicators between males and females and can be affected by nutritional regime  
408 (reviewed in [35]). While high fat diets are known to not alter male cuticular  
409 hydrocarbons [31], the effect of *adp<sup>60</sup>* and food deprivation is not known. Larger males  
410 may generally indicate better quality sperm based on nutrition; however, Partridge et al.  
411 [25] also argued that larger males are more active and generally more persistent, so the  
412 increased copulation seen in the current study from the high fat fed group may be due to a  
413 form of male coercion.

414

## 415 1. Conclusions

416 Overall, we find that altering nutrient storage through diet or genetic manipulation has  
417 effects on courtship in the fruit fly, *D. melanogaster*. The increased drive to reproduce by  
418 food deprived flies was unexpected, but is reasonable based on species’ reproductive

419 investment and longevity. We suspect that such findings would be different in species  
420 with a different natural history, such as those with a greater longevity where one can  
421 afford to wait for the proper resources to become available. More research is needed to  
422 identify the exact physiological cue that activates reproductive behavior across species  
423 with such varied life histories to better understand reproductive motivation in the context  
424 of natural history. We believe utilizing a combination of manipulation of animal diets and  
425 the use of mutants to manipulate physiological pathways can help illuminate the resource  
426 mechanisms that drive the reproduction axis. Species such as *D. melanogaster* are  
427 particularly powerful in this regard as such mutants exist both naturally, such as the *adp*<sup>60</sup>  
428 mutants used here, and can be artificially created to probe the effects of specific genes  
429 and metabolic processes on organismal reproduction.

430

## 431 2. Acknowledgements

432 We would like to thank Grzegorz Polak and Justin Palermo for help with fly husbandry.  
433 This research did not receive any specific grant from funding agencies in the public,  
434 commercial, or not-for-profit sectors.

435

## 436 References:

- 437 1. Kohsaka A, Laposky AD, Ramsey KM, Estrada C, Joshu C, Kobayashi Y, et al. High-  
438 fat diet disrupts behavioral and molecular circadian rhythms in mice. *Cell Metab.*  
439 2007;6:414–421. doi: 10.1016/j.cmet.2007.09.006
- 440 2. Lim RS, Eyjólfsson E, Shin E, Perona P, Anderson DJ. How food controls  
441 aggression in *Drosophila*. *PloS One* 2014;9:e105626.  
442 doi:10.1371/journal.pone.0105626
- 443 3. Redman LM, Heilbronn LK, Martin CK, De Jonge L, Williamson DA, Delany JP, et  
444 al. Metabolic and behavioral compensations in response to caloric restriction:  
445 implications for the maintenance of weight loss. *PloS One* 2009;4:e4377. doi:  
446 10.1371/journal.pone.0004377

- 447 4. Bronson F. Puberty and energy reserves: a walk on the wild side. In: Wallen, K.,  
448 Schneider JE, editors. *Reproduction in Context: Social and Environmental*  
449 *Influences on Reproduction*. Cambridge, Massachusetts; London, England: MIT  
450 Press; 2000. p.15–33.
- 451 5. Gittleman JL, Thompson SD. Energy allocation in mammalian reproduction. *Am.*  
452 *Zool.* 1988;28:863–875. doi: 10.1093/icb/28.3.863
- 453 6. Schneider JE. Energy balance and reproduction. *Physiol. Behav.* 2004; 81:289–317.  
454 doi: 10.1016/j.physbeh.2004.02.007
- 455 7. Schneider JE, Wade GN. Inhibition of reproduction in service of energy budget. In:  
456 Wallen, K., Schneider JE, editors. *Reproduction in Context: Social and*  
457 *Environmental Influences on Reproduction*. Cambridge, Massachusetts; London,  
458 England: MIT Press; 2000 p.15–33.
- 459 8. Martin TE. Food as a limit on breeding birds: a life-history perspective. *Annu. Rev.*  
460 *Ecol. Syst.* 1987;18:453–487.
- 461 9. Sibly RM, Witt CC, Wright NA, Venditti C, Jetz W, Brown JH. Energetics, lifestyle,  
462 and reproduction in birds. *Proc. Natl. Acad. Sci.* 2012;109:10937–10941. doi:  
463 10.1073/pnas.1206512109
- 464 10. Lind CM, Beaupre SJ. Male Snakes Allocate Time and Energy according to  
465 Individual Energetic Status: Body Condition, Steroid Hormones, and  
466 Reproductive Behavior in Timber Rattlesnakes, *Crotalus horridus*. *Physiol.*  
467 *Biochem. Zool.* 2015;88:624–633. doi: 10.1086/683058
- 468 11. Van Dyke JU, Griffith OW, Thompson MB. High Food Abundance Permits the  
469 Evolution of Placentotrophy: Evidence from a Placental Lizard, *Pseudemoia*  
470 *entrecasteauxii*. *Am. Nat.* 2014;184:198–210. doi: 10.1086/677138
- 471 12. Ottinger MA, Mobarak M, Abdelnabi M, Roth G, Proudman J, Ingram DK. Effects of  
472 calorie restriction on reproductive and adrenal systems in Japanese quail: are  
473 responses similar to mammals, particularly primates? *Mech. Ageing Dev.* 2005;  
474 126:967–975. doi: 10.1016/j.mad.2005.03.017
- 475 13. Cheng D, Chen L, Yi C, Liang G, Xu Y. Association between changes in  
476 reproductive activity and D-glucose metabolism in the tephritid fruit fly,  
477 *Bactrocera dorsalis* (Hendel). *Sci. Rep.* 2014; 4(7489):1-9.14. doi:  
478 10.1038/srep07489
- 479 14. Warburg MS, Yuval B. Effects of energetic reserves on behavioral patterns of  
480 Mediterranean fruit flies (Diptera: Tephritidae). *Oecologia* 1997;112:314–319.  
481 doi: 10.1007/s004420050314
- 482 15. Baker KD, Thummel CS. Diabetic larvae and obese flies—emerging studies of  
483 metabolism in *Drosophila*. *Cell Metab.* 2007;6:257–266.
- 484 16. Häder T, Müller S, Aguilera M, Eulenberg KG, Steuernagel A, Ciossek T, et al.  
485 Control of triglyceride storage by a WD40/TPR-domain protein. *EMBO Rep.*  
486 2003;4: 511–516. doi: 10.1038/sj.embor.embor837
- 487 17. Birse RT, Choi J, Reardon K, Rodriguez J, Graham S, Diop S, et al. High-fat-diet-  
488 induced obesity and heart dysfunction are regulated by the TOR pathway in  
489 *Drosophila*. *Cell Metab.* 2010;12:533–544. doi: 10.1016/j.cmet.2010.09.014
- 490 18. Reis T, Van Glist MR, Hariharan IK. A buoyancy-based screen of *Drosophila*  
491 larvae for fat-storage mutants reveals a role for Sir2 in coupling fat storage to

- 492 nutrient availability. *PloS Genet.* 2010; 6(11): e1001206. doi:  
493 10.1371/journal.pgen.1001206.
- 494 19. Cobb M, Connolly K, Burnet B. Courtship behaviour in the melanogaster species  
495 sub-group of *Drosophila*. *Behaviour.* 1985; 95:203–230. doi:  
496 10.1163/156853985X00136
- 497 20. Kauffman, A.S., Rissman, E.F., 2004. A critical role for the evolutionarily conserved  
498 gonadotropin-releasing hormone II: mediation of energy status and female sexual  
499 behavior. *Endocrinology* 145, 3639–3646. doi: 10.1210/en.2004-0148
- 500 21. Ewing AW, Bennet-Clark H. The courtship songs of *Drosophila*. *Behaviour* 1968; 31:  
501 288–301. doi: 10.1163/156853968X00298
- 502 22. Gingras RM, Warren ME, Nagengast AA, DiAngelo JR. The control of lipid  
503 metabolism by mRNA splicing in *Drosophila*. *Biochem. Biophys. Res. Commun.*  
504 2014;443: 672–676. doi: 10.1016/j.bbrc.2013.12.027
- 505 23. Suh JM, Zeve D, McKay R, Seo J, Salo Z, Li R, et al. Adipose is a conserved dosage-  
506 sensitive antiobesity gene. *Cell Metab.* 2007;6:195–207.
- 507 24. Schwasinger-Schmidt TE, Kachman SD, Harshman LG. Evolution of  
508 starvation resistance in *Drosophila melanogaster*: measurement of direct and  
509 correlated responses to artificial selection. *J. Evol. Biol.* 2012;25:378-387. doi:  
510 10.1111/j.1420-9101.2011.02428.x
- 511 25. Partridge L, Ewing A, Chandler A. Male size and mating success in *Drosophila*  
512 *melanogaster*: the roles of male and female behaviour. *Anim. Behav.* 1987;35:  
513 555–562. doi: 10.1016/S0003-3472(87)80281-6
- 514 26. Magwere T, Chapman T, Partridge L. Sex differences in the effect of dietary  
515 restriction on life span and mortality rates in female and male *Drosophila*  
516 *melanogaster*. *J. Gerontol. A. Biol. Sci. Med. Sci.* 2004;59:B3–B9. doi:  
517 10.1093/gerona/59.1.B3
- 518 27. Polak M, Starmer WT. Parasite-induced risk of mortality elevates reproductive effort  
519 in male *Drosophila*. *Proc. R. Soc. Lond. B Biol. Sci.* 1998;265:2197–2201. doi:  
520 10.1098/rspb.1998.0559
- 521 28. Doane WW. Developmental physiology of the mutant female sterile (2) adipose of  
522 *Drosophila melanogaster*. I. Adult morphology, longevity, egg production, and  
523 egg lethality. *J. Exp. Zool. Part Ecol. Genet. Physiol.* 1960;145:1–21. doi:  
524 10.1002/jez.1401450102
- 525 29. Fernandez-Fernandez R, Martini A, Navarro V, Castellano J, Dieguez C, Aguilar E,  
526 et al. Novel signals for the integration of energy balance and reproduction. *Mol.*  
527 *Cell. Endocrinol.* 2006; 254: 127–132.
- 528 30. Lee KP, Simpson SJ, Clissold FJ, Brooks R, Ballard JWO, Taylor PW, et al. Lifespan  
529 and reproduction in *Drosophila*: new insights from nutritional geometry. *Proc.*  
530 *Natl. Acad. Sci.* 2008;105:2498–2503. doi: 10.1073/pnas.0710787105
- 531 31. Schultzhaus JN, Bennett CJ, Iftikhar H, Yew JY, Mallett J, Carney GE. High fat diet  
532 alters *Drosophila melanogaster* sexual behavior and traits: decreased  
533 attractiveness and changes in pheromone profiles. *Sci. Rep.* 2018; 8:5387.  
534 doi:10.1038/s41598-018-23662-2
- 535 32. Teague BD, Clark AG, Doane WW. Developmental analysis of lipids from wild-type  
536 and adipose60 mutants of *Drosophila melanogaster*. *J. Exp. Zool. Part Ecol.*  
537 *Genet. Physiol.* 1986;240:95–104.

- 538 33. Hoikkala A, Aspi J, Suvanto L. Male courtship song frequency as an indicator of  
539 male genetic quality in an insect species, *Drosophila montana*. Proc. R. Soc.  
540 Lond. B Biol. Sci. 1998;265:503–508. Doi: 10.1098/rspb.1998.0323
- 541 34. Ritchie MG, Saarikettu M, Livingstone S, Hoikkala A. Characterization of female  
542 preference functions for *Drosophila montana* courtship song and a test of the  
543 temperature coupling hypothesis. Evolution 2001;55:721–727. doi: 10.1554/0014-  
544 3820(2001)055[0721:COFPPF]2.0.CO;2
- 545 35. Ferveur JF. Cuticular hydrocarbons: their evolution and roles in *Drosophila*  
546 pheromonal communication. Behav. Genet. 2005;35:279-295. doi:  
547 10.1007/s10519-005-3220-5  
548  
549  
550  
551  
552  
553  
554  
555  
556  
557

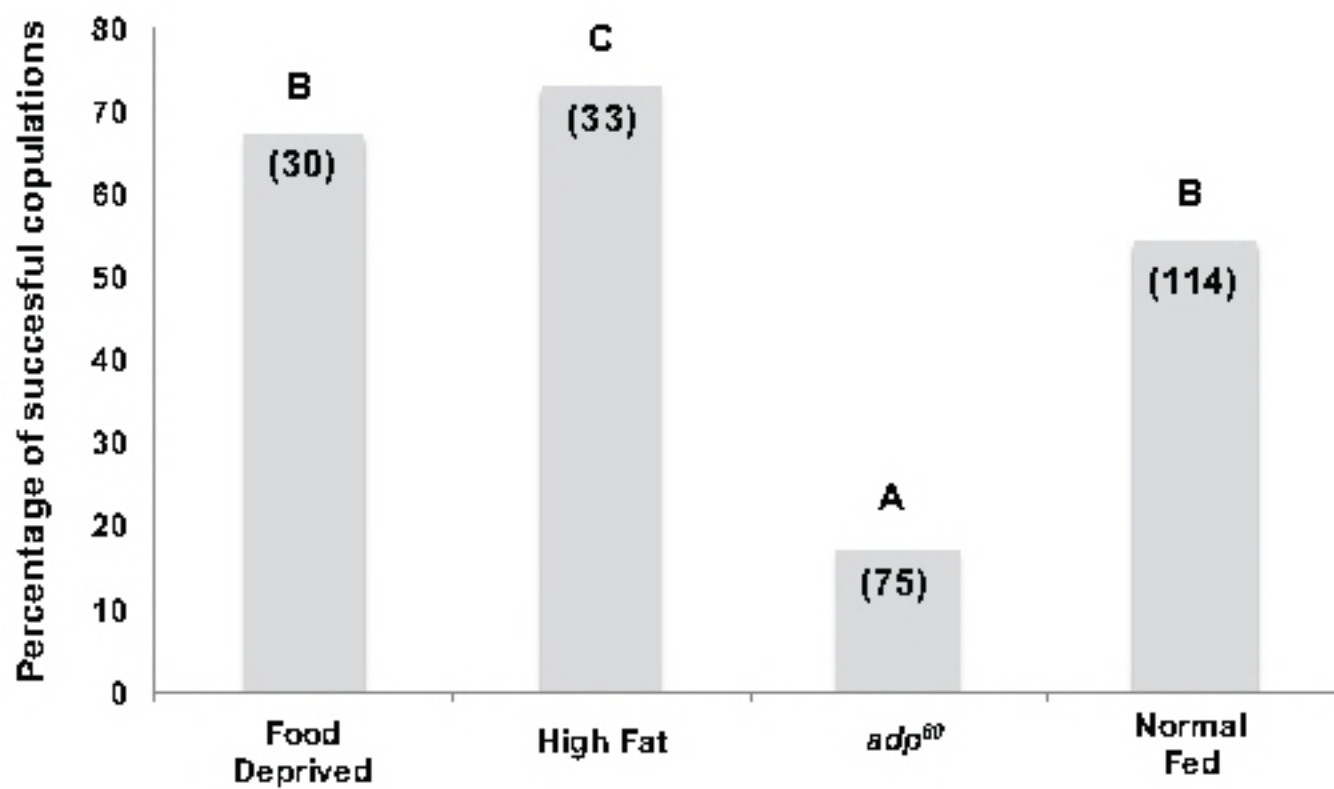

bioRxiv preprint doi: <https://doi.org/10.1101/331660>; this version posted May 25, 2018. The copyright holder for this preprint (which was not certified by peer review) is the author/funder, who has granted bioRxiv a license to display the preprint in perpetuity. It is made available under aCC-BY 4.0 International license.

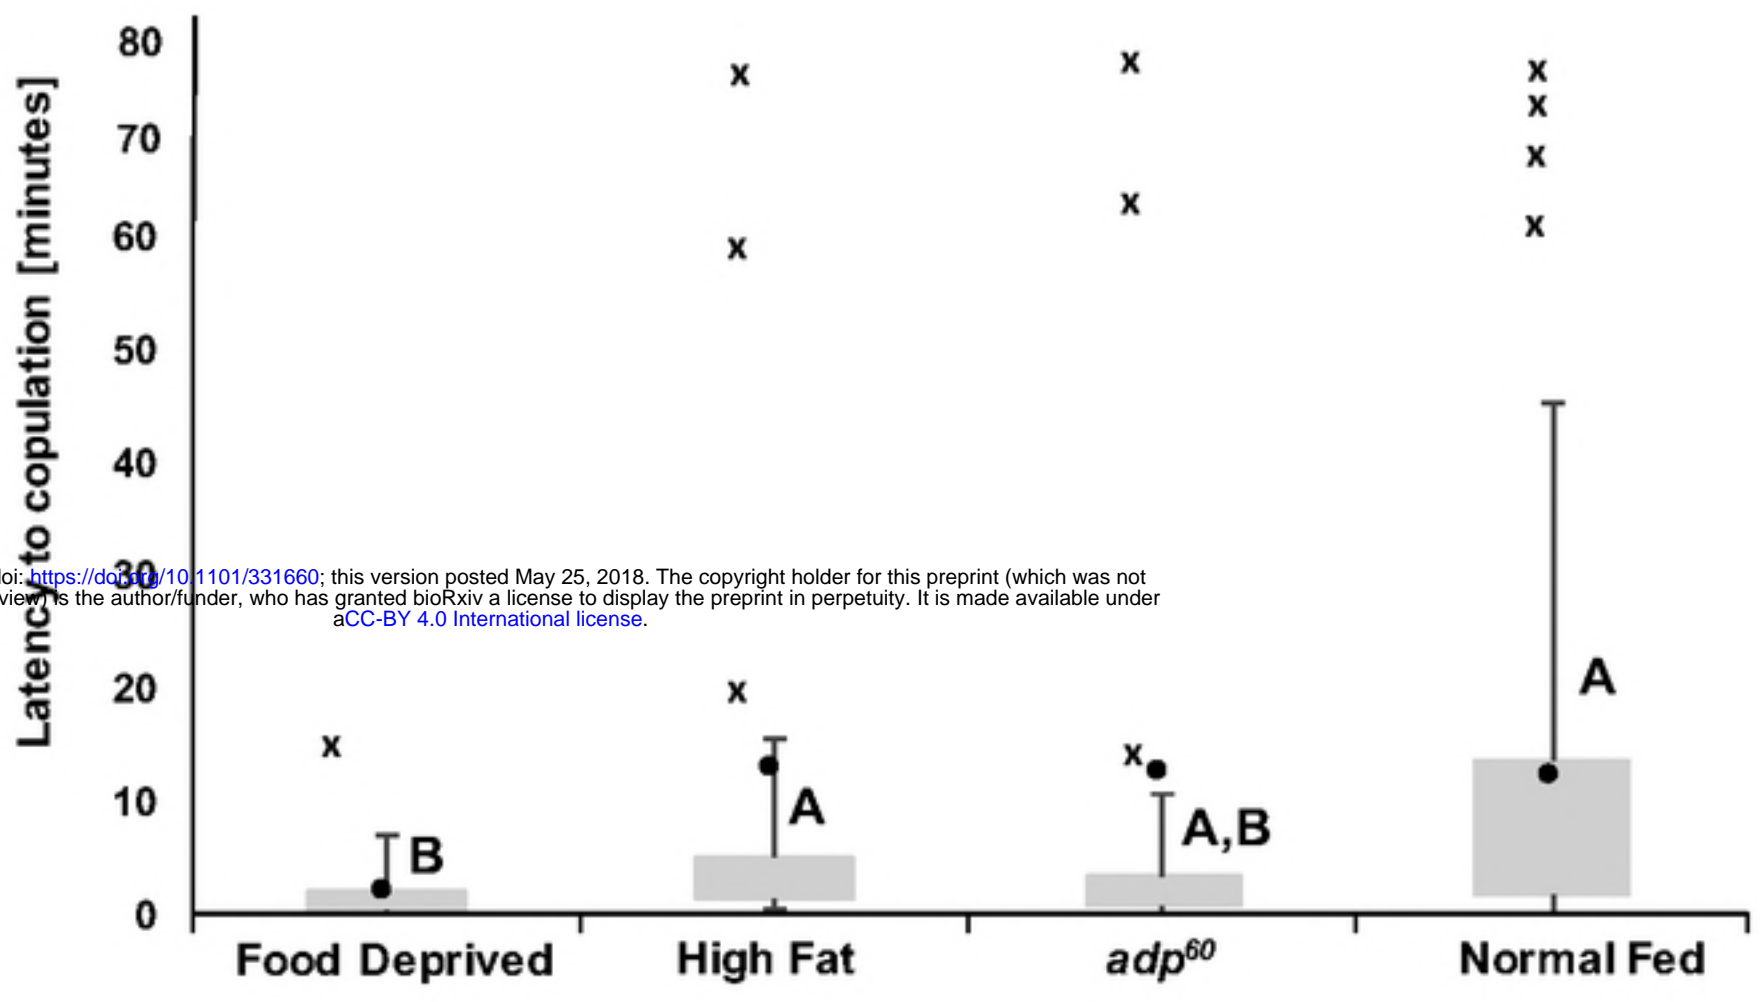



bioRxiv preprint doi: <https://doi.org/10.1101/331660>; this version posted May 25, 2018. The copyright holder for this preprint (which was not certified by peer review) is the author/funder, who has granted bioRxiv a license to display the preprint in perpetuity. It is made available under aCC-BY 4.0 International license.

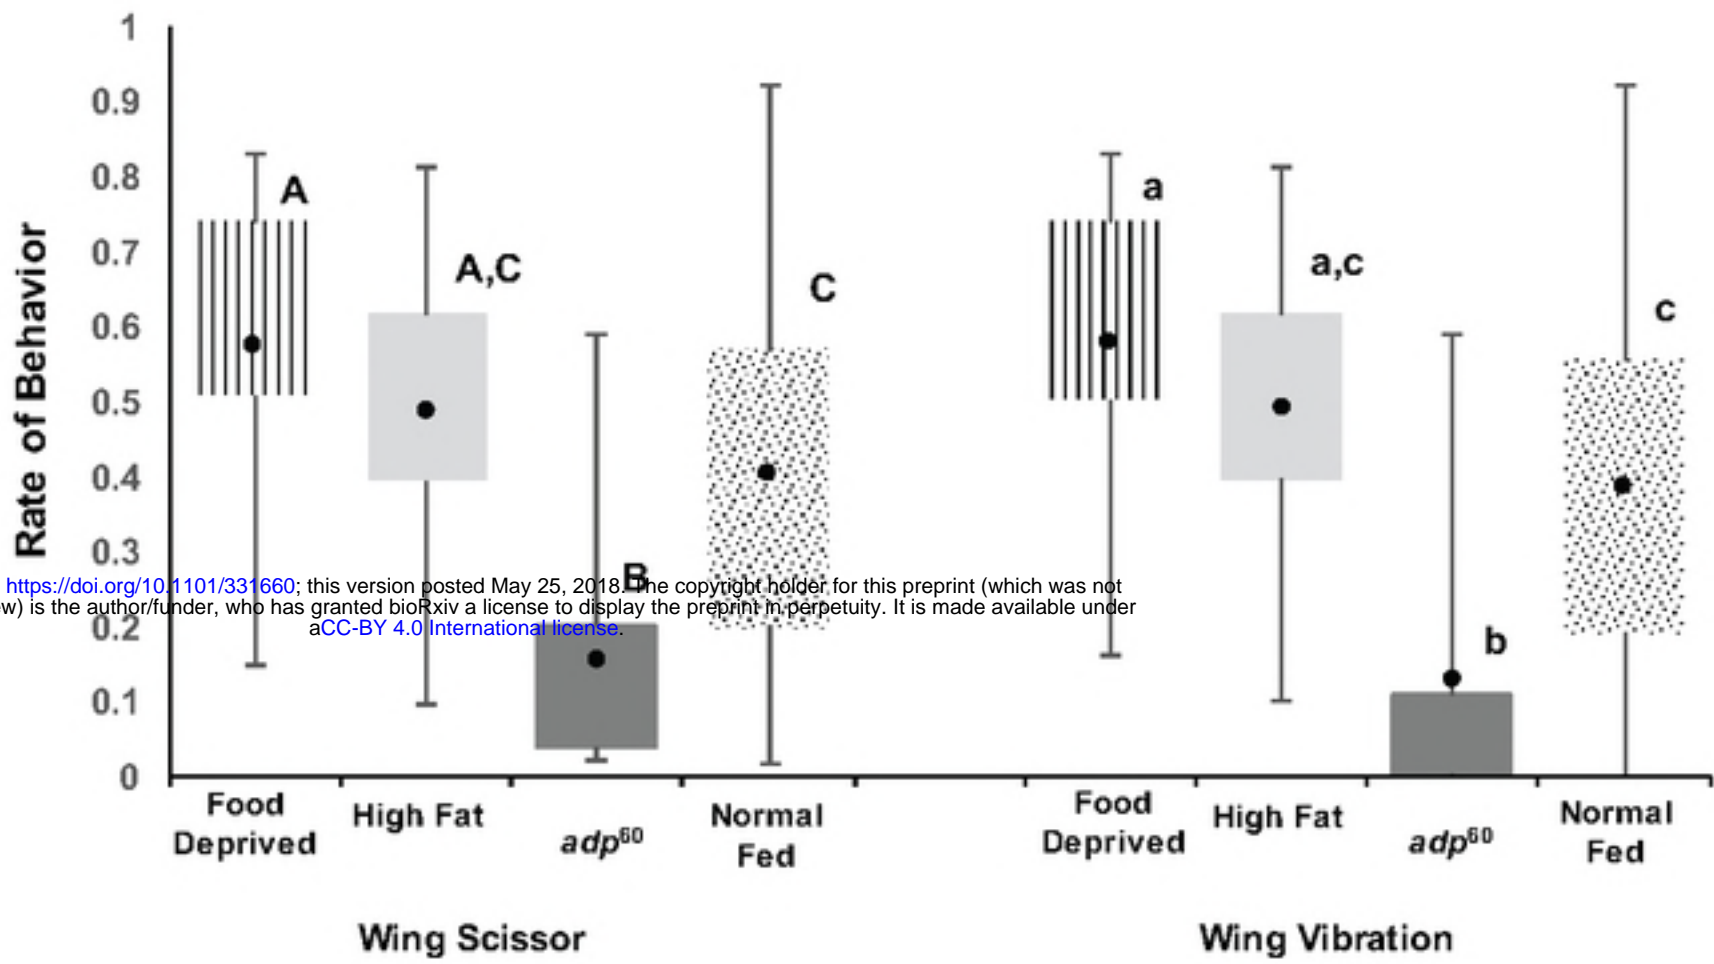

bioRxiv preprint doi: <https://doi.org/10.1101/331660>; this version posted May 25, 2018. The copyright holder for this preprint (which was not certified by peer review) is the author/funder, who has granted bioRxiv a license to display the preprint in perpetuity. It is made available under aCC-BY 4.0 International license.

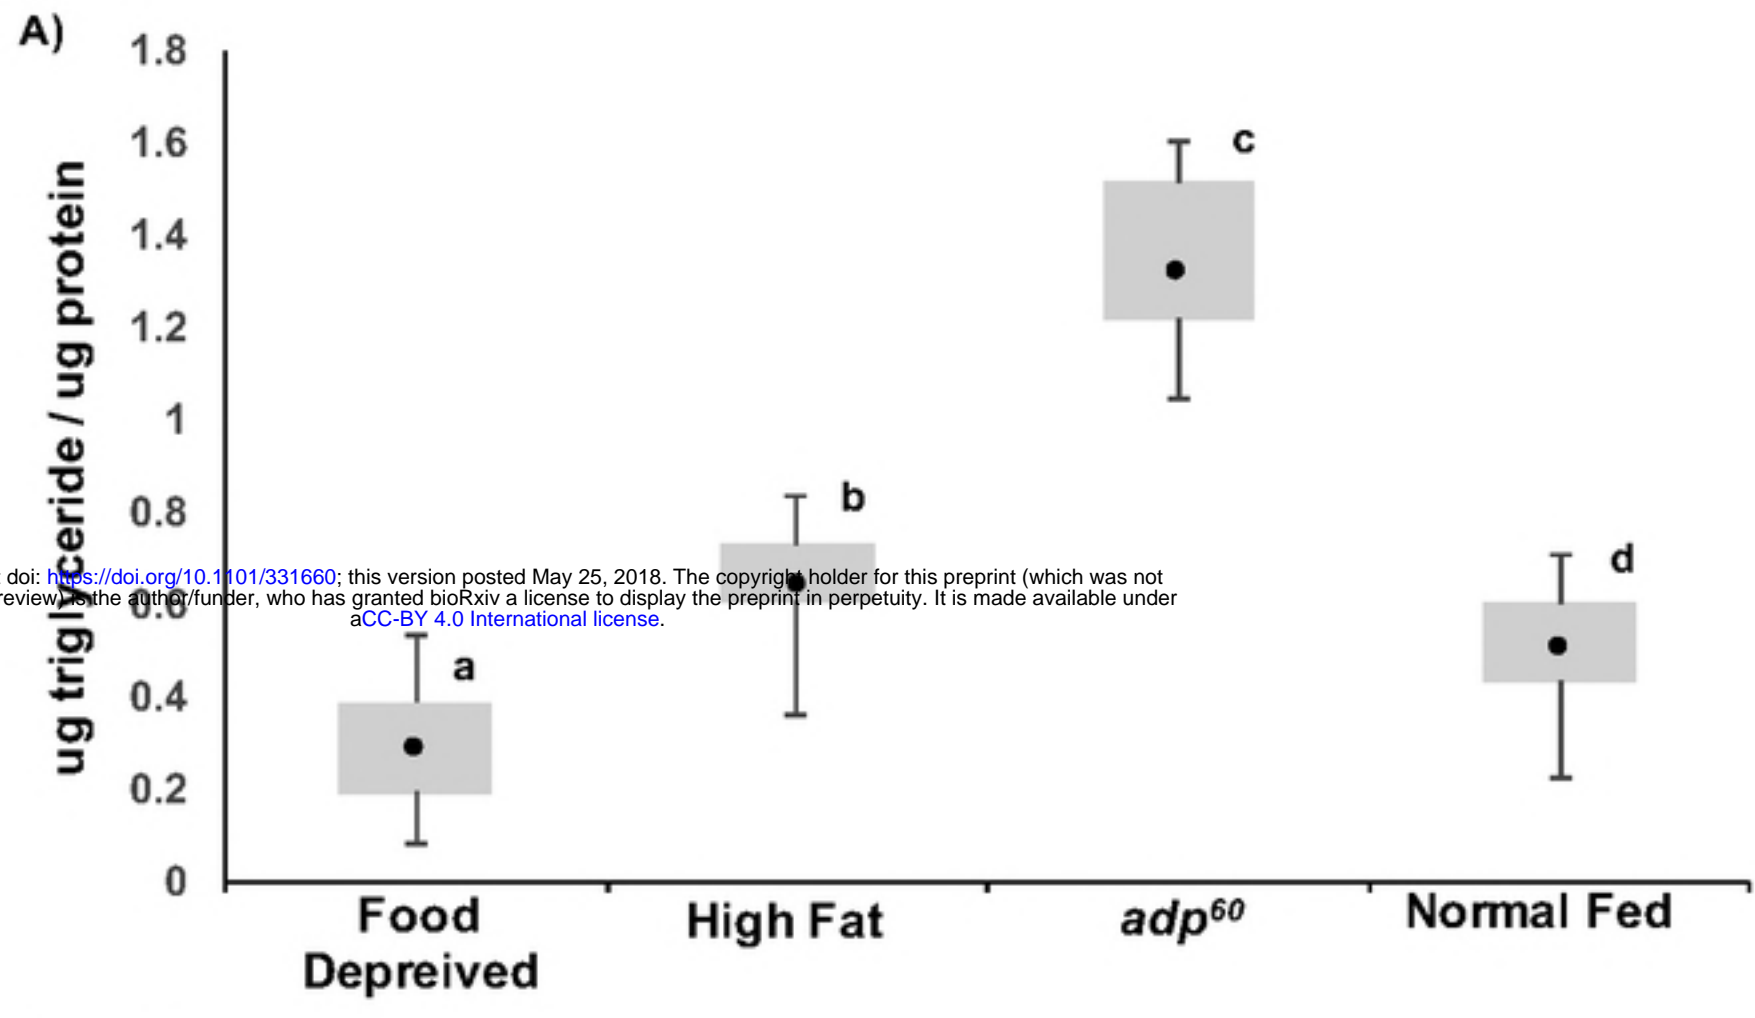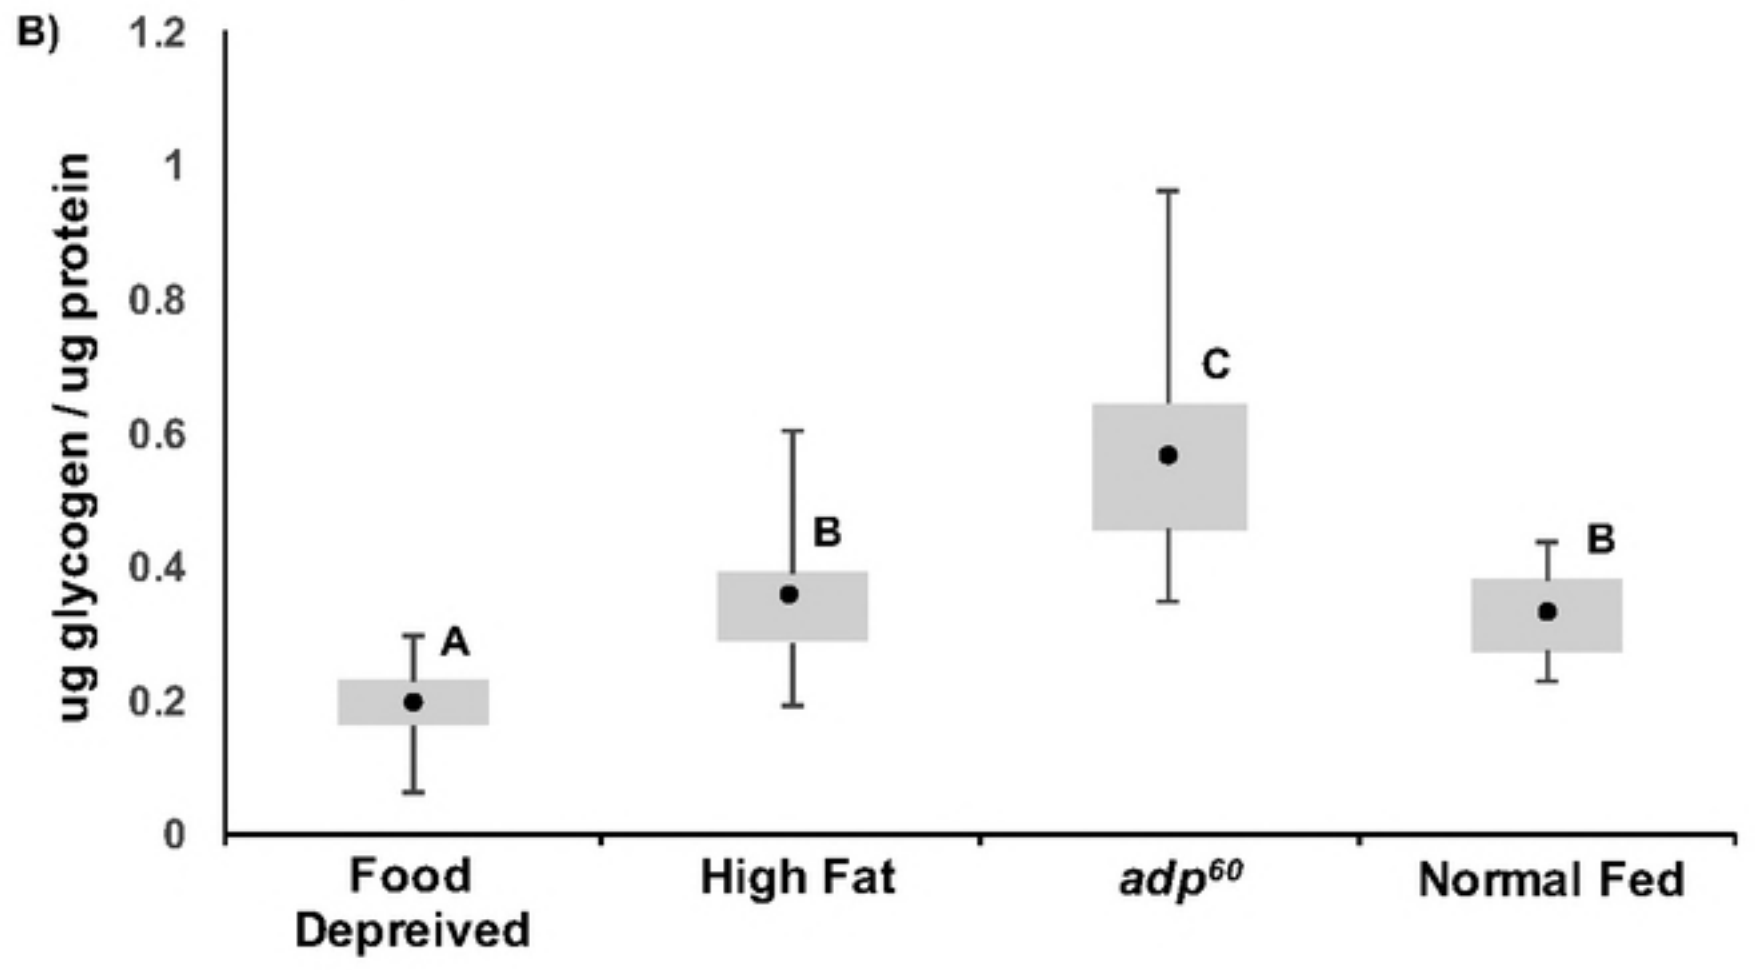

Source: http://biorxiv.org/content/10.1101/331660v1.full.pdf
